# Supplementary material for: Influenza B virus suppression of Chromosome Y-linked genes increases pulmonary virus replication and disease severity in male mice
Source: Research Square preprint supplement (doi:10.21203/rs.3.rs-9066058/v1), 2026-03-24

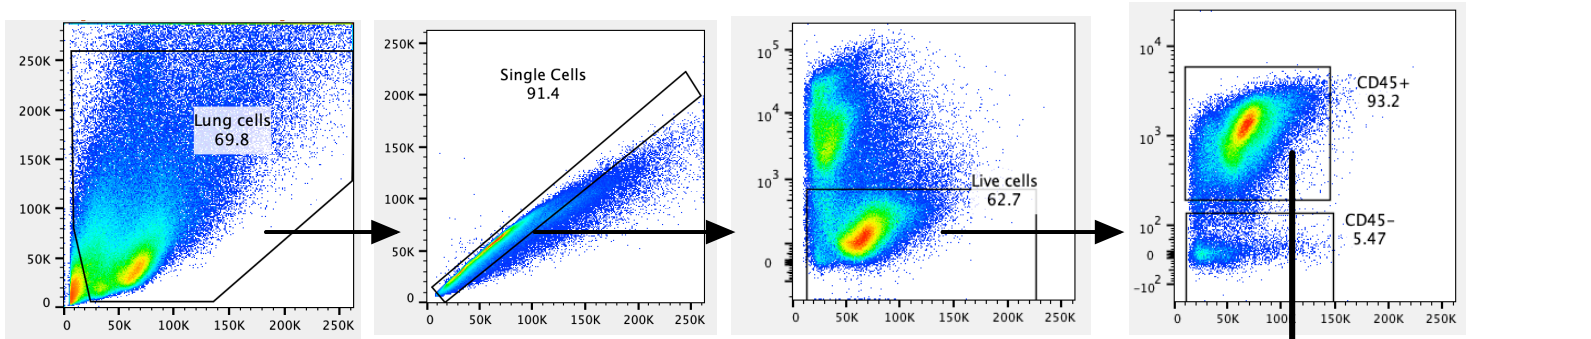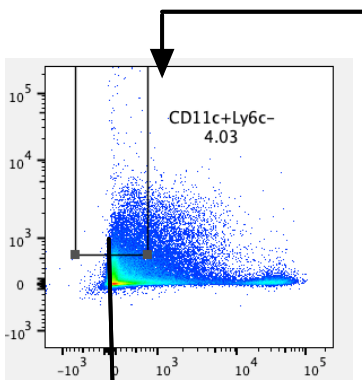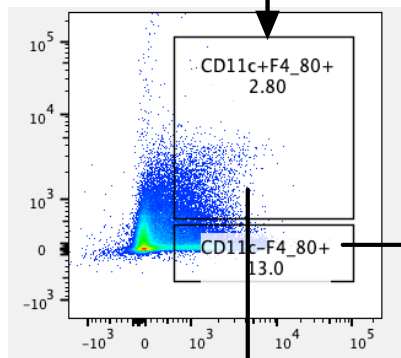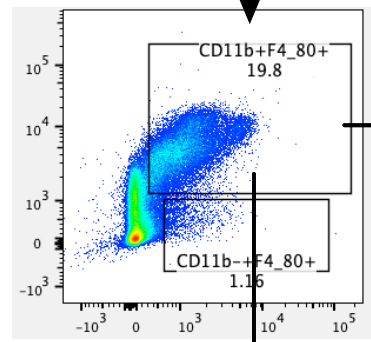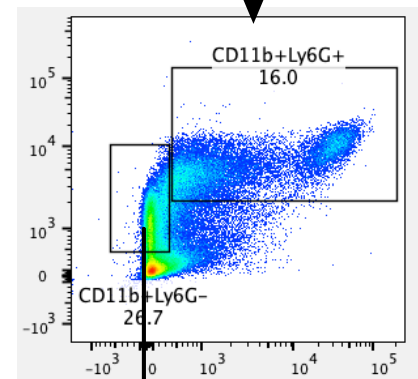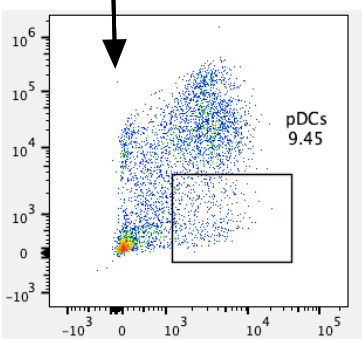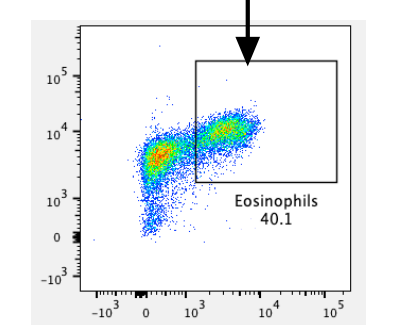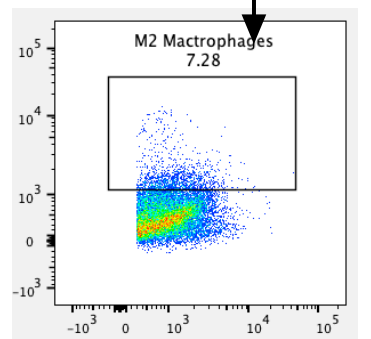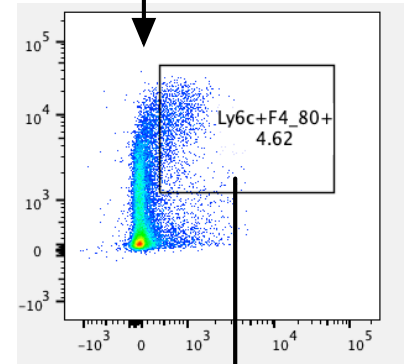

PDCA1+ pDCs

Eosinophils

CD206+ Macrophages

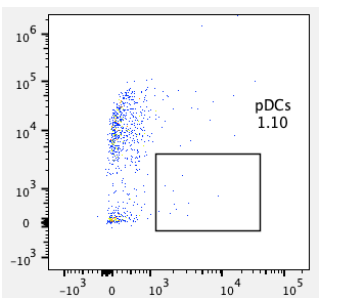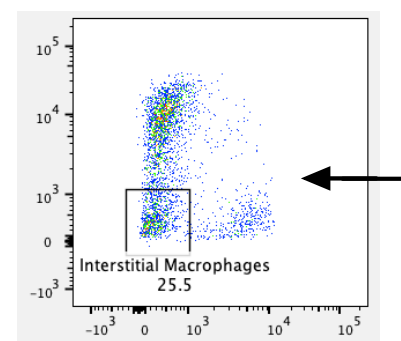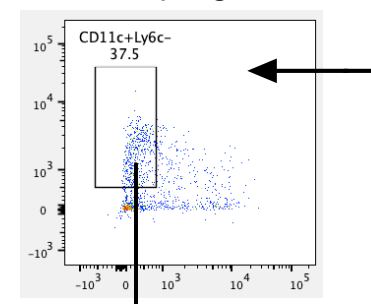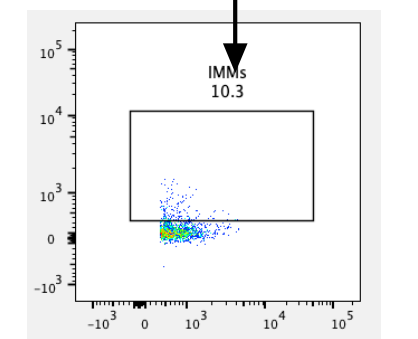

FMO control for pDCs

CD11c- F4/80+ Interstitial Macrophages

Alveolar Macrophages 54.0

CD11c+ F4/80+ Alveolar Macrophages

Ly6C+ CCR2+ IMMcs

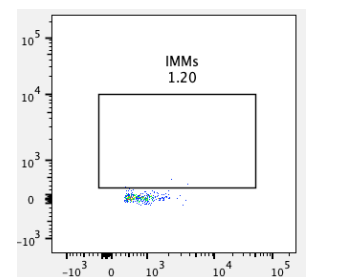

FMO control for IMMcs

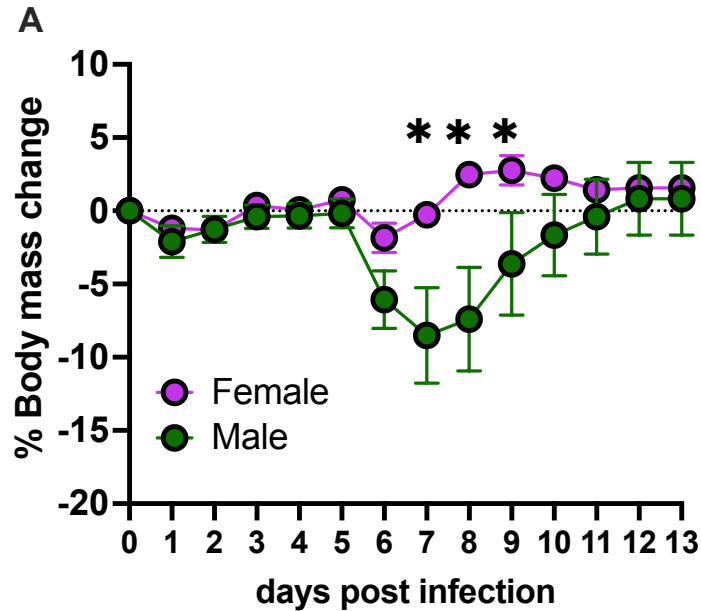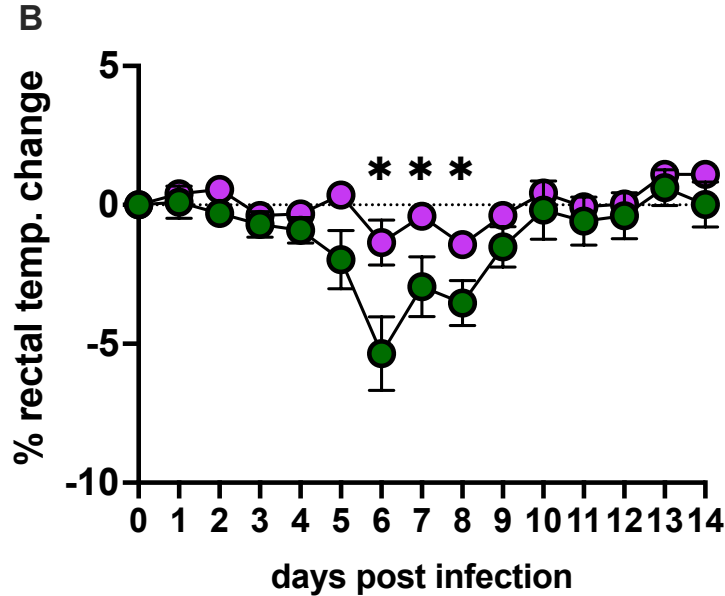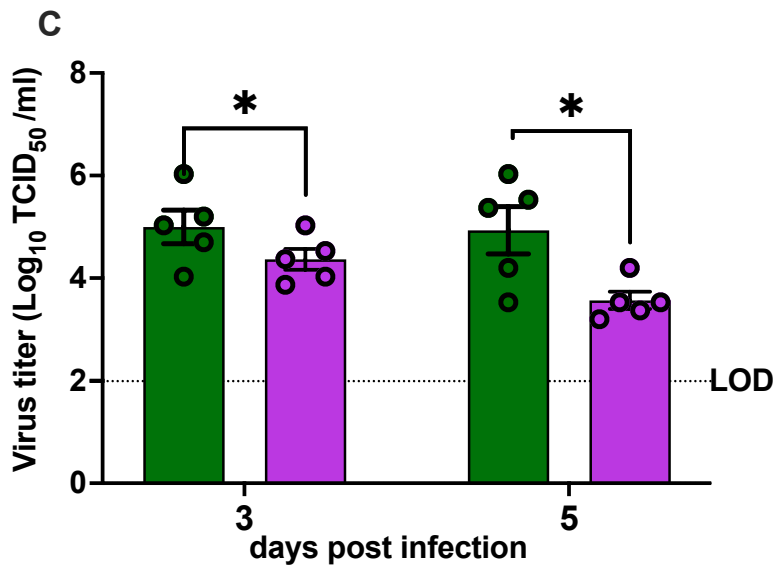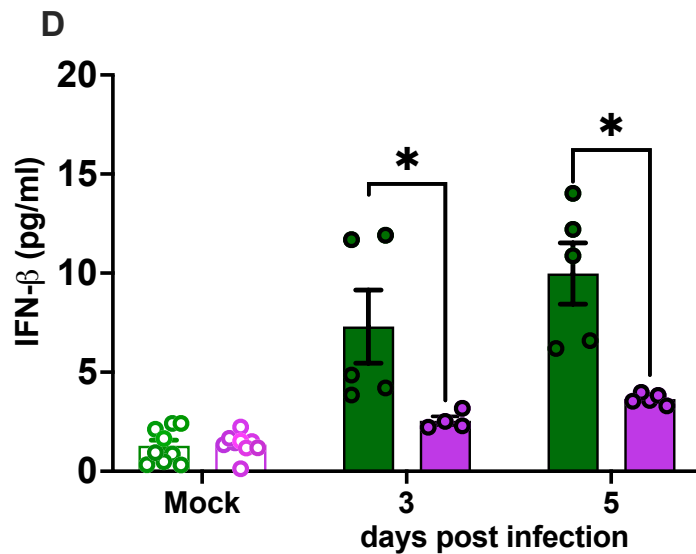

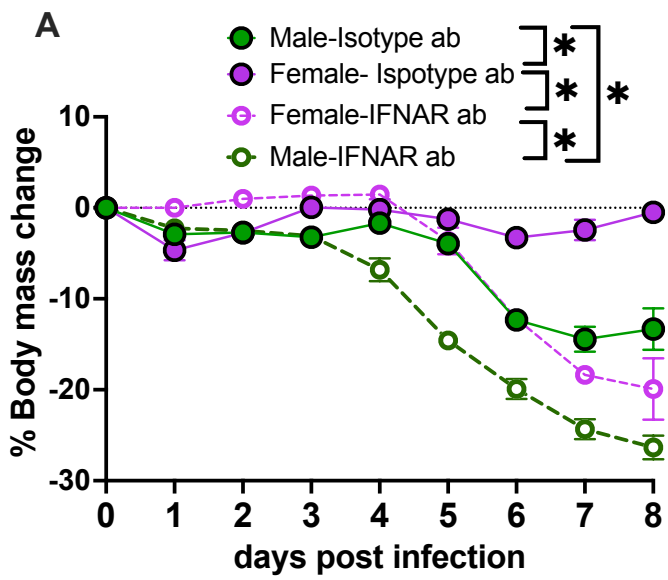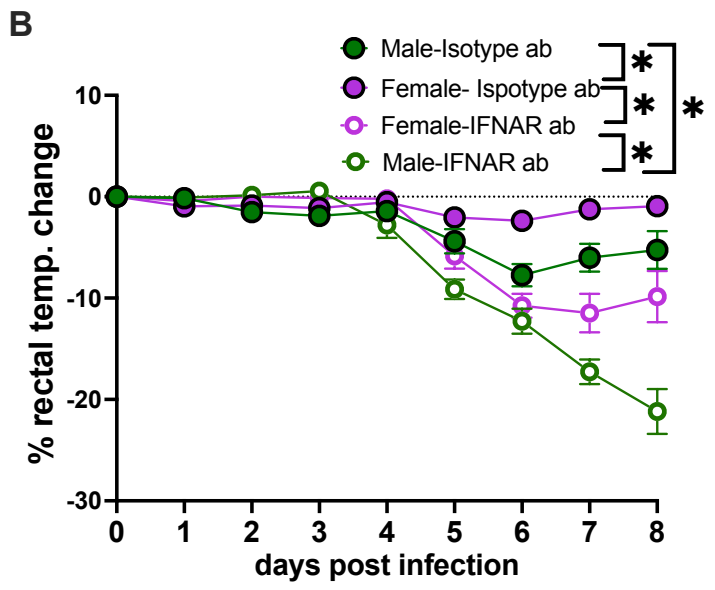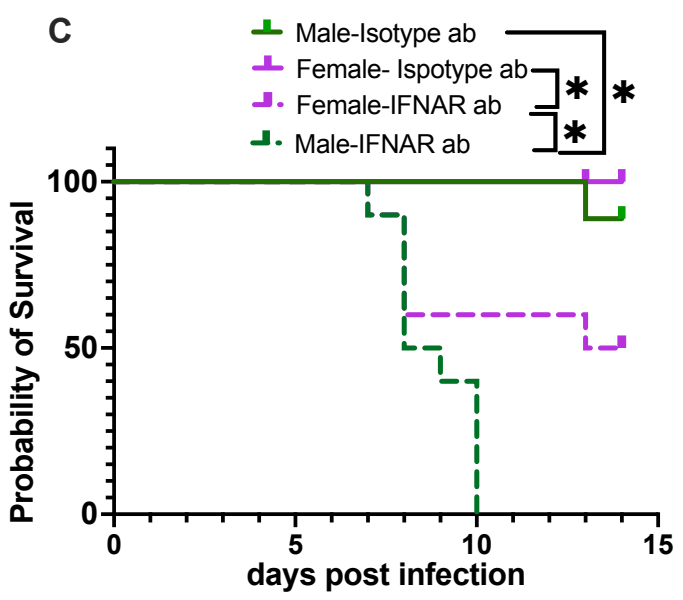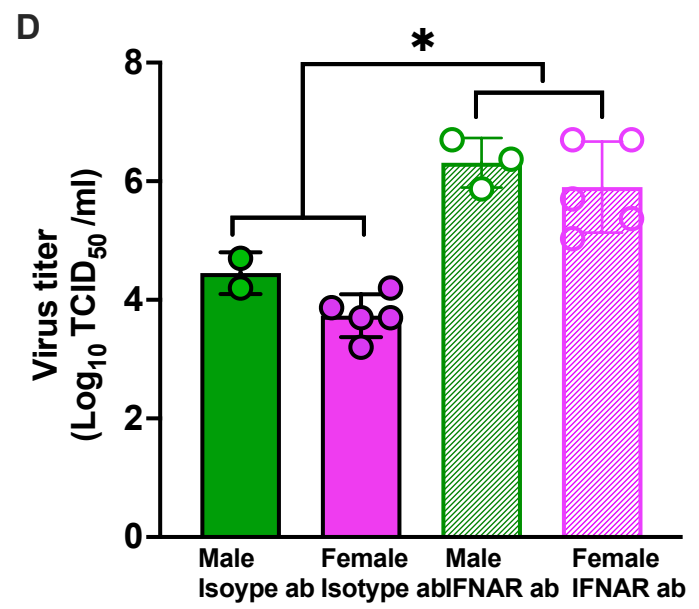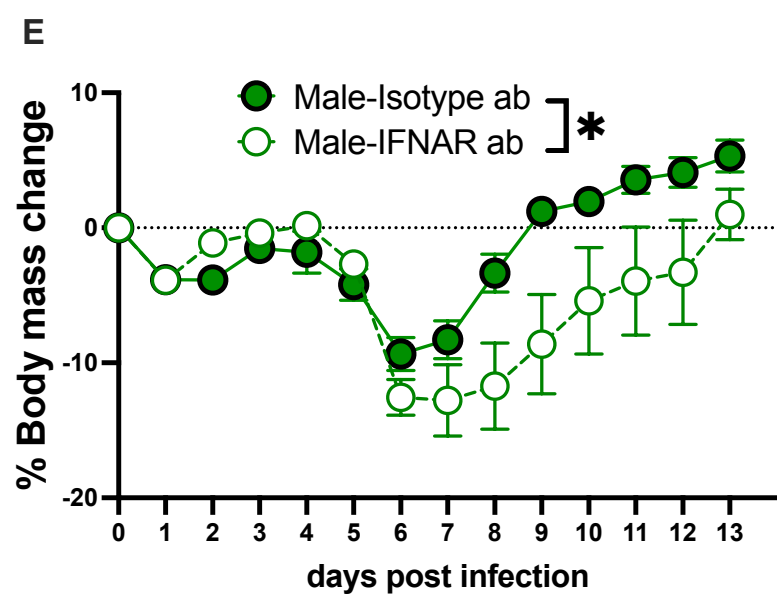

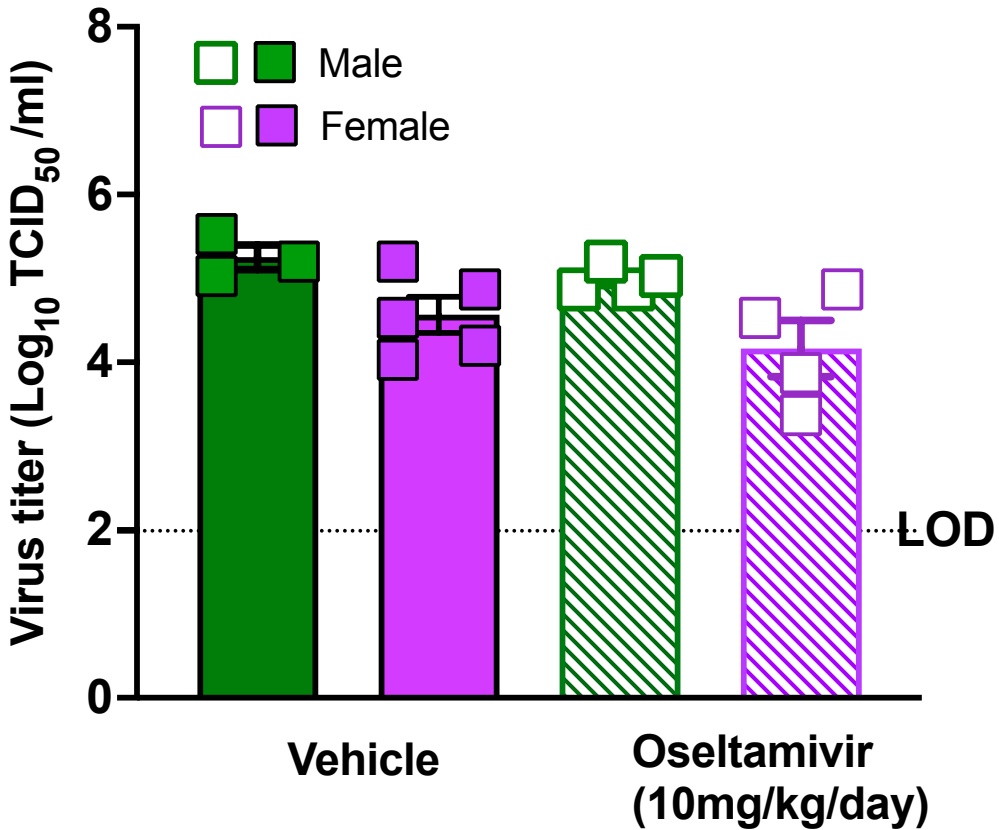

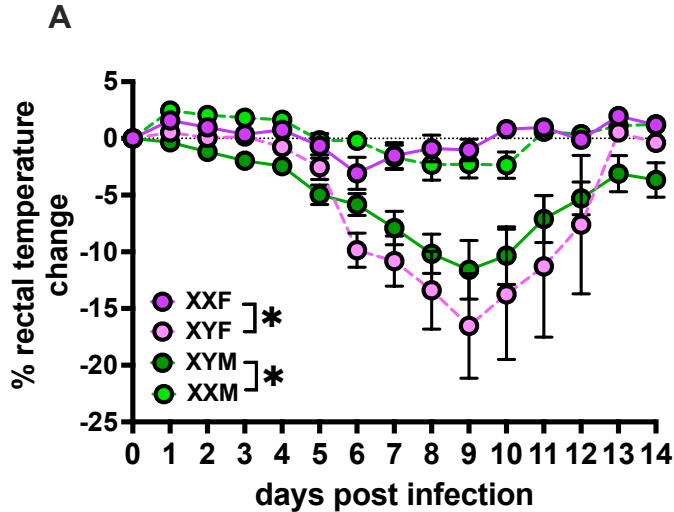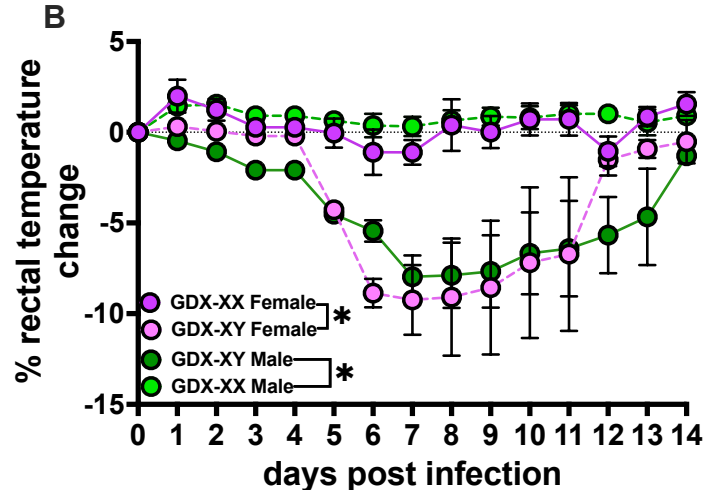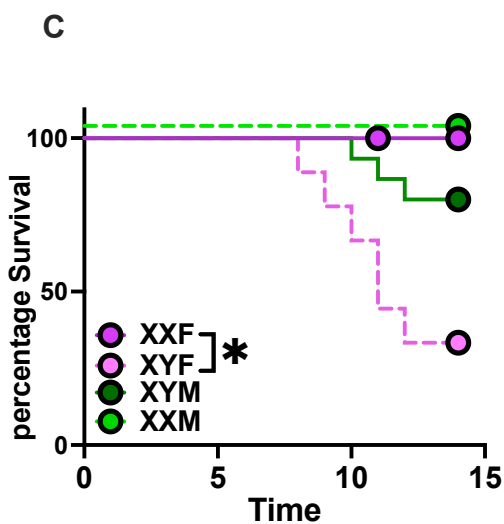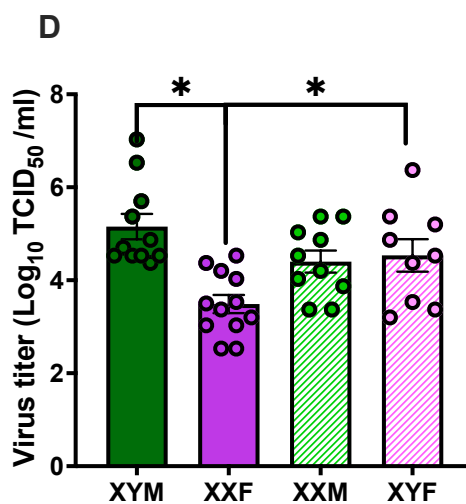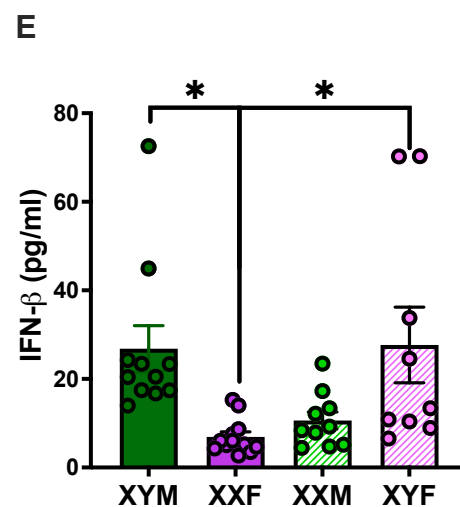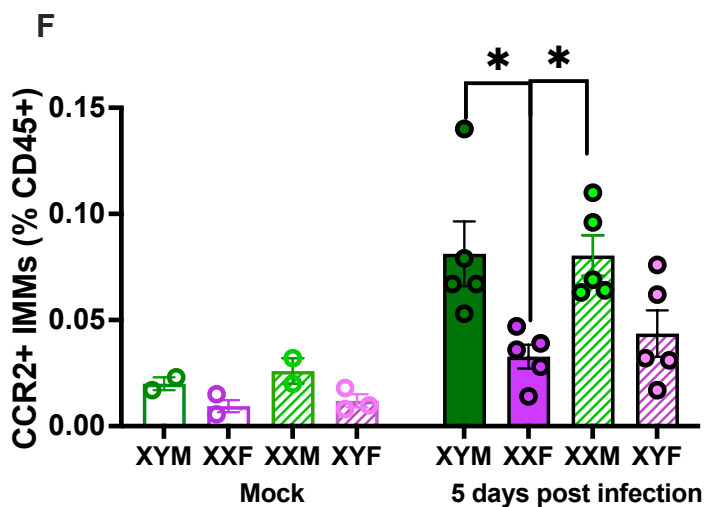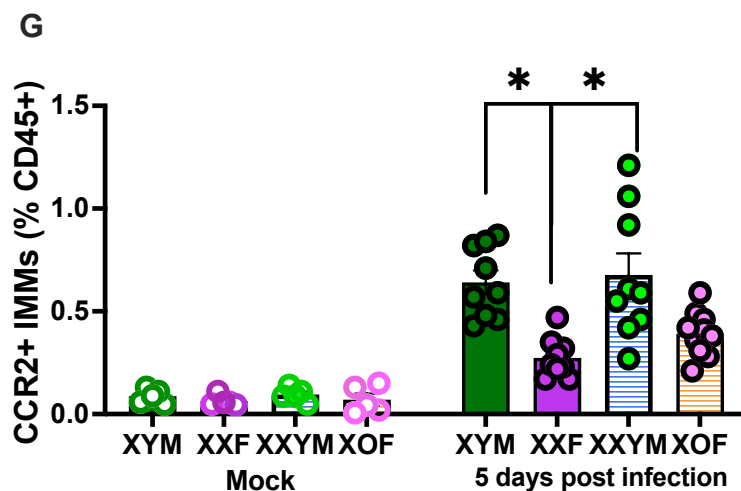

**A**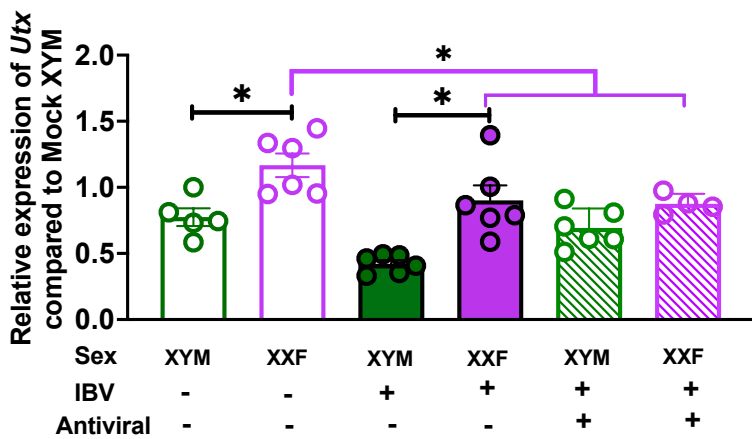**B**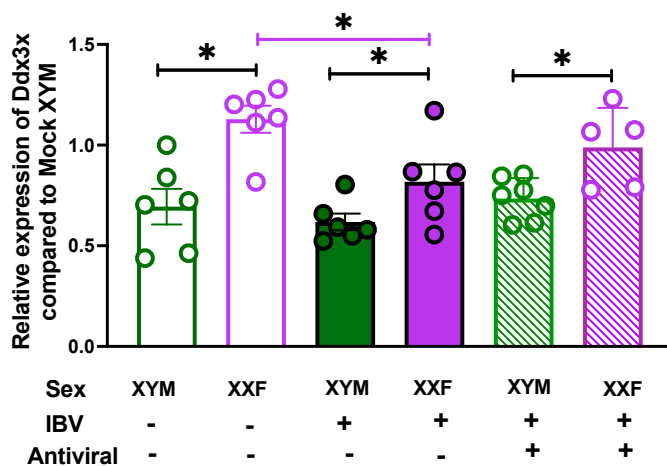**C**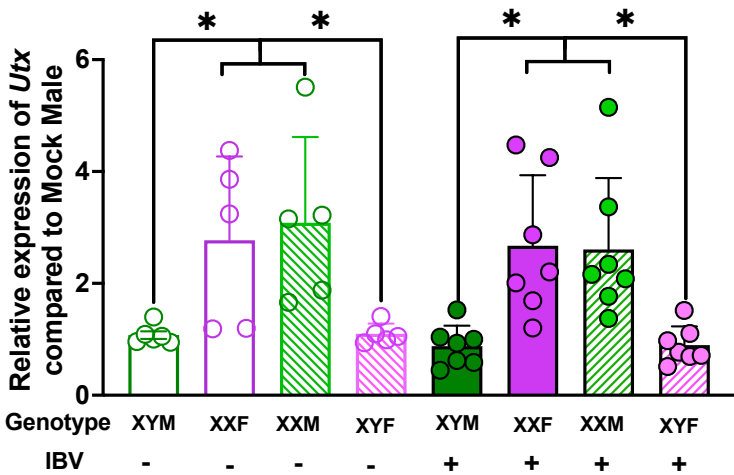**D**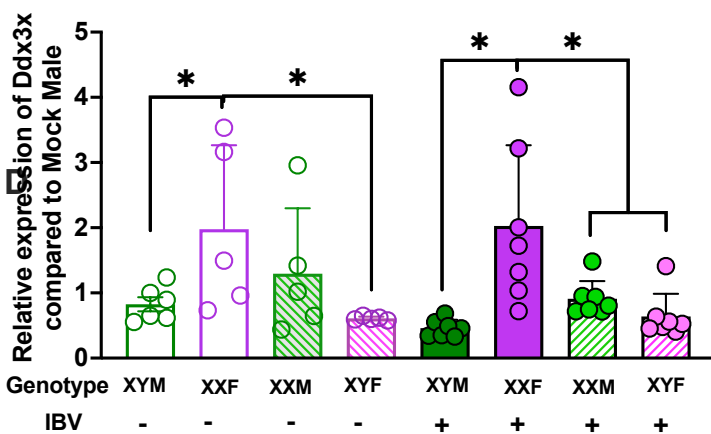**E**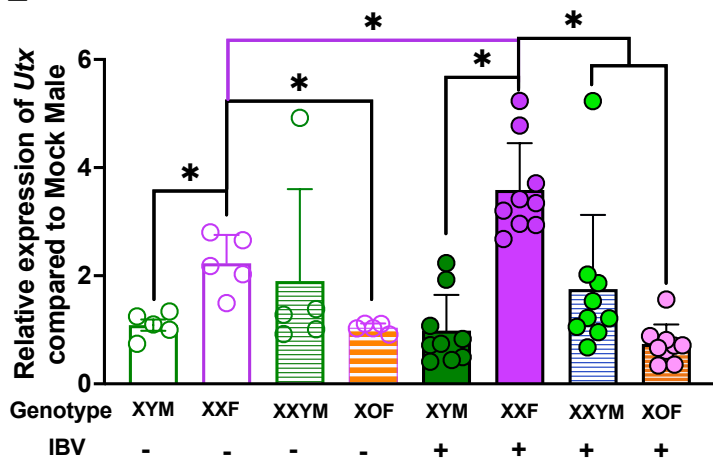**F**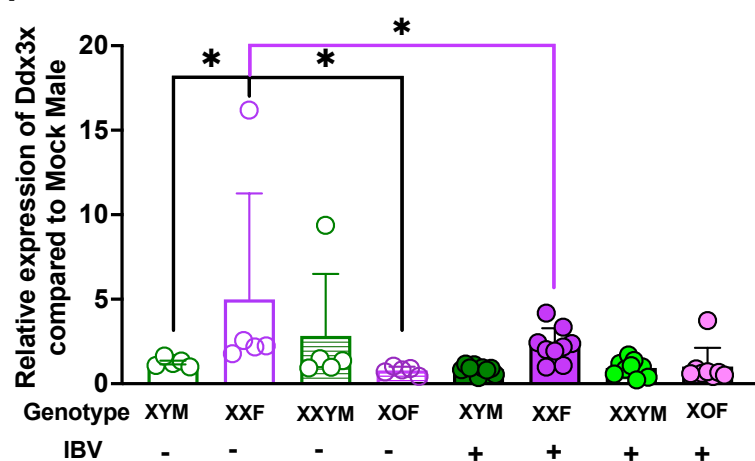

Supplement: Supplementary file 2 [file 24907032607bedf7d021b547.pdf]
