# Supplementary material for: Influenza B virus suppression of Chromosome Y-linked genes increases pulmonary virus replication and disease severity in male mice
Source: Research Square preprint supplement (doi:10.21203/rs.3.rs-9066058/v1), 2026-03-24
Supplement: Supplementary file 1 [file 1f3b327be0f6b1201501807a.docx]

| Analyte | Male Serum | | | Female serum | | |
| --- | --- | --- | --- | --- | --- | --- |
| Cytokine | **Mock** | **3 DPI** | **7 DPI** | **Mock** | **3 DPI** | **7 DPI** |
| **IFNγ** | 37.69 ± 8.16 | 98.84 ± 38.7 | 103.65 ± 47.03 | 36.88 ± 7.02 | 40.35 ± 27.90 | 26.88 ± 7.95 |
| **IFN α** | 736.36 ± 197.32 | 588.76 ± 169.06 | 3310.3 ± 504.05 | 3497.51 ± 392.55 | 4229.25 ± 377.97 | 4140.78 ± 460.09 |
| **IL-28** | 4862.71 ± 954.32 | 47329.60 ± 6257.35 | 47034.72 ± 3484.12 | 4219.85 ± 495.57 | 51392.68 ± 8381.99 | 41808.54 ± 4267.15 |
| **IL-1α** | 424.17 ± 136.46 | 364.15 ± 57.95 | 354.11 ± 32.11 | 395.82 ± 80.61 | 261.31 ± 33.03 | 416.90 ± 83.61 |
| **IL-1β** | 41.47 ± 5.46 | 265.49 ± 41.55 | 310.49 ± 34.33 | 47.45 ± 4.88 | 95.32 ± 24.71 | 60.56 ± 14.13 |
| **IL-18** | 2473.10 ± | 2473.10 ± 603.94 | 1938.03 ± 227.61 | 296.95 ± 24.01 | 6933.11 ± 4677.83 | 1938.03 ± 227.61 |
| **IL-33** | 8830.69 ± 857.24 | 39145.54 ± 4954.56 | 37954.38 ± 4536.06 | 6041.19 ± 478.19 | 30964.25 ± 5019.16 | 41018.33 ± 4389.86 |
| **IL-33R** | 2304.10 ± 625.68 | 1446.50 ± 1016.88 | 1632.739 ± 1220.759 | 1537.92 ± 501.77 | 1534.44 ± 774.11 | 4074.25 ± 1864.74 |
| **IL-2R** | 77.33 ± 10.57 | 73.59 ± 22.29 | 30.91 ± 17.97 | 72.93 ± | 101.03 ± 24.59 | 41.46 ± 19.58 |
| **IL-7** | 418.72 ± 65.35 | 905.65 ± 107.56 | 1104.92 ± 0 | 432.34 ± 58.76 | 976.70 ± 88.45 | 1049.72 ± 55.19 |
| **IL-9** | 101.50 ± 26.87 | 286.37 ± 1.71E-14 | 186.71 ± 21.74 | 87.77 ± 27.24 | 247.54 ± 20.05 | 257.89 ± 18.98 |
| **IL-15/ 15R** | ± 39.56 | 203.62 ± 13.47 | 874.75 ± 128.52 | 219.30 ± 16.67 | 205.40 ± 10.51 | 507.46 ± 51.54 |
| **TNFα** | 197.59 ± 65.33 | 131.94 ± 15.48 | 300.22 ± 41.28 | 231.40 ± 25.09 | 235.18 ± 27.42 | 201.59 ± 22.39 |
| **TNFSF11** | 16.67 ± 3.08 | 14.67 ± 3.47 | 33.19 ± 11.90 | 54.34 ± 17.79 | 37.05 ± 13.86 | 45.40 ± 16.85 |
| **BAFF** | 274.57 ± 68.29 | 178.64 ± 22.03 | 364.92 ± 116.52 | 133.14 ± 34.12 | 300.39 ± 121.76 | 223.87 ± 94.99 |
| **IL-10** | 729.97 ± 113.09 | 613.48 ± 57.69 | 6962.53 ± 3.46 | 7531.79 ± 3.31 | 7774.55 ± 3.16 | 7774.55 ± 3.16 |
| **IL-19** | 5452.92 ± 1335.19 | **4944.96 ± 675.77** | 4663.11 ± 913.29 | 12438.36 ± 3174.18 | **7303.66 ± 2694.13** | 10707.19 ± 2924.36 |
| **IL-22** | 320.22 ± 39.09 | 269.03 ± 7.65 | 568.40 ± 177.32 | 417.69 ± 88.07 | 288.01 ± 26.01 | 340.04 ± 39.74 |
| **IL-12p70** | 19.89 ± 3.53 | 18.87 ± 5.32 | 9.40 ± 2.21 | 8.66 ± 1.89 | 9.77 ± 2.07 | 25.35 ± 16.68 |
| **IL-23** | 599.49 ± 271.07 | 386.73 ± 77.97 | 999.75 ± 172.79 | 703.49 ± 86.89 | 847.31 ± 86.36 | 1075.02 ± 433.11 |
| **IL-17A** | 157.75 ± 17.08 | 171.51 ± 18.02 | 336.51 ± 111.58 | 248.74 ± 91.68 | 244.24 ± 101.24 | 475.24 ± 149.50 |
| **IL-25** | 143.59 ± 57.90 | 152.92 ± 51.26 | 323.38 ± 91.79 | 254.28 ± 26.36 | 301.95 ± 65.63 | 326.08 ± 110.08 |
| **IL-6** | 466.65 ± 91.63 | 405.05 ± 45.00 | 2009.38 ± 329.73 | 1882.46 ± 212.19 | 2401.91 ± 379.94 | 2116.95 ± 284.95 |
| **IL-31** | 4210.99 ± 1262.99 | 3790 ± 0 | 7992.18 ± 782.89 | 8820.28 ± 670.85 | 7851.21 ± 801.31 | 8341.91 ± 749.55 |
| **CCL2** | 840.46 ± 79.58 | 838.86 ± 75.79 | 591.49 ± 168.03 | 269.61 ± 27.86 | 405.03 ± 147.94 | 392.22 ± 149.90 |
| **CCL4** | 29.6 ± 4.05 | 32.46 ± 7.53 | 65.11 ± 22.18 | 49.09 ± 20.35 | 23.96 ± 15.27 | 40.80 ± 17.14 |
| **CCL7** | 416.68 ± 111.46 | 253.47 ± 0 | 221.85 ± 16.511 | 218.978 ± 17.81 | 215.52 ± 19.31 | 228.17 ± 16.86 |
| **CCL11** | 1044.27 ± 248.53 | 723.44 ± 116.29 | **729.11 ± 199.24** | 1070.29 ± 254.78 | 1295.08 ± 339.31 | **2272.17 ± 360.94** |
| **CXCL1** | 130.44 ± 21.60 | 108.52 ± 13.45 | 186.10 ± 29.64 | 149.64 ± 24.04 | 167.02 ± 53.98 | 209.98 ± 51.98 |
| **CXCL2** | 27.45 ± 6.46 | 22.79 ± 4.02 | 34.36 ± 4.75 | 39.41 ± 5.21 | 45.47 ± 5.09 | 39.23 ± 4.15 |
| **CXCL10** | 106.56 ± 14.63 | 113.23 ± 12.14 | 304.8 ± 126.79 | 355.79 ± 102.50 | 501.59 ± 230.19 | 444.93 ± 127.76 |
| **G-CSF** | 44.40 ± 11.44 | 48.85 ± 12.46 | 57.86 ± 14.70 | 74.77 ± 12.75 | 86.15 ± 9.86 | 68.03 ± 6.03 |
| **GM-CSF** | 210.55 ± 51.54 | 246.84 ± 43.25 | 200.5 ± 135.59 | 39.18 ± 4.45 | 42.64 ± 3.10 | 44.97 ± 2.33 |
| **M-CSF** | 15.98 ± 2.01 | 14.35 ± 1.01 | 27.31 ± 11.81 | 21.17 ± 2.39 | 19.31 ± 2.19 | 46.16 ± 18.47 |
| **VEGF-A** | 433.41 ± 120.16 | 368.67 ± 20.35 | 1150.69 ± 186.20 | 1398.89 ± 173.32 | 1538.28 ± 113.88 | 1367.46 ± 139.47 |
| **IL-5** | 320.22 ± 39.09 | 269.03 ± 7.65 | 568.40 ± 177.32 | 417.69 ± 88.07 | 288.01 ± 26.01 | 340.04 ± 39.74 |
| **Leptin** | 2202.14 ± 183.67 | 2034.66 ± 157.02 | 1594.06 ± 1285.93 | 476.41 ± 296.59 | 54 ± 0 | 681.78 ± 409.65 |

* Bold indicates a statistically significant difference between sexes at a given DPI based on multiple unpaired t tests with Holm-Šídák correction for multiple comparisons, adjusted p value <0.05 (n=4-7/group) +/- SEM
