# Supplementary material for: Influenza B virus suppression of Chromosome Y-linked genes increases pulmonary virus replication and disease severity in male mice
Source: Research Square preprint supplement (doi:10.21203/rs.3.rs-9066058/v1), 2026-03-24
Supplement: Supplementary file 3 [file 3e21b2c12e8da75aac6231fd.docx]

| Analyte | Male Lungs | | | | Female Lungs | | | | |
| --- | --- | --- | --- | --- | --- | --- | --- | --- | --- |
| Cytokine | **Mock** | **3 DPI** | **5 DPI** | **7 DPI** | **Mock** | **3 DPI** | **5 DPI** | **7 DPI** |
| **IFNγ** | 31.32 ± 2.46 | 114.2 ± 38.3 | 1051.21 ± 114.02 | **12003.39± 2245.36** | 29.43 ± 1.78 | 110.85 ± 29.57 | 433.50 ± 81.03 | **2246.551 ± 565.02** |
| **IL-28** | 806.6296 ± 36.004 | **822.8246 ± 102.33** | 1154.0576 ± 32.73 | 950.244 ± 55.91 | 780.5096 ± 21.33 | **1014.5952 ± 50.16** | 1045.244 ± 61.22 | 1058.8352 ± 79.41 |
| **IL-1α** | 525.7 ± 63.68 | 425.09 ± 56.09 | 500.51 ± 100.08 | 598.09 ± 56.15 | 372.3 ± 35.83 | 703.62 ± 151.44 | 576.32 ± 133.66 | 443.43 ± 60.19 |
| **IL-1β** | 76.35 ± 21.29 | 47.17 ± 1.65 | 70.88 ± 10.32 | 63.65 ± 14.56 | 62.67 ± 19.5 | 95.32 ± 24.71 | 60.56 ± 14.13 | 56.90± 13.81 |
| **IL-18** | 284.55 ± 28.91 | 219.86 ± 24.89 | 917.83 ±101.89 | 366.92 ± 108.42 | 296.95 ± 24.01 | 187.46 ± 22.14 | 781.96 ± 115.29 | 382.216 ± 106.35 |
| **IL-33** | 35217.2± 5036.0 | 13455.5 ± 1698.6 | 43411.99 ± 3488.87 | 27247 ± 2914.59 | 29407.83 ± 4567.93 | 12657.0 ± 1833.8 | 29124.08 ± 3972.31 | 19409.03 ± 1798.47 |
| **IL-33R** | 1846.80 ± 190.48 | 1212.66 ± 534.24 | 1990.82 ± 1.31E-13 | 278.78 ± 1.78E-14 | 1722.90 ± 160.37 | 890.76 ± 334.50 | 1990.82 ± 8.03E-14 | 863.43 ± 554.65 |
| **IL-2** | 128.94 ± 20.95 | 133.95 ± 14.32 | **147.56 ± 27.80** | 140.55 ± 14.85 | 101.97 ± 9.32 | 134.56 ± 16.47 | **248.57 ± 42.23** | 159.46 ± 13.55 |
| **IL-2R** | 38.83 ± 8.56 | 12.68 ± 4.81 | 40.09 ± 3.84 | 5.78 ± 0 | 42.20 ± 9.10 | 22.34 ± 7.47 | 29.03 ± 3.21 | 5.78 ± 0 |
| **IL-4** | 154.59 ± 14.38 | 149.00 ± 26.22 | **554.65 ± 144.99** | 204.16 ± 24.23 | 160.73 ± 13.03 | 227.74 ± 86.14 | **163.51 ± 0** | 191.03 ± 24.17 |
| **IL-7** | 346.52 ± 148.90 | 773.80 ± 141.04 | 224.29 ± 71.37 | **1216.61 ± 171.23** | 218.13 ± 53.67 | 936.88 ± 189.23 | 408.91 ± 129.44 | **1126.20 ± 56.20** |
| **IL-7Rα** | 539.16 ± 196.93 | 734.22 ± 171.61 | 568.92 ± 92.73 | 1489.19 ± 286.06 | 318.24 ± 20.38 | 1107.23 ± 319.56 | 573.89 ± 143.33 | 1119.89 ± 233.56 |
| **IL-9** | 101.50 ± 26.87 | 168.42 ± 38.81 | 203.12 ± 35.16 | 282.07 ± 1.7e-14 | 87.77 ± 27.24 | 219.85 ± 32.80 | 122.6 ± 30.64 | 282.07 ± 1.79E-14 |
| **IL-15/ 15R** | 224.50 ± 39.56 | 203.62 ± 13.47 | 874.75 ± 128.52 | 407.05 ± 56.08 | 219.30 ± 16.67 | 205.40 ± 10.51 | 507.46 ± 51.54 | 251.07 ± 47.79 |
| **TNFα** | 131.73 ± 34.05 | 179.54 ± 10.53 | 102.57 ± 9.65 | 228.19 ± 28.78 | 103.98 ± 14.46 | 190.76 ± 3.45 | 78.16 ± 6.34 | 167.85 ± 14.25 |
| **TNFSF11** | 58.80 ± 6.17 | 40.84 ± 10.31 | 176.76 ± 15.56 | 48.56 ± 7.36 | 65.53 ± 8.51 | 32.09 ± 9.96 | 137.97 ± 7.29 | 27.57 ± 5.19 |
| **BAFF** | 211.19 ± 51.11 | 313.60 ± 72.17 | 324.81 ± 57.28 | 181.29 ± 32.13 | 126.02 ± 33.58 | 826.22 ± 428.86 | 206.86 ± 55.41 | 60.32 ± 18.00 |
| **IL-10** | 810.70 ± 102.76 | 530.53 ± 3.28e-14 | 1484.46 ± 156.98 | 690.40 ± 181.27 | 830.35 ± 65.54 | 703.58 ± 148.52 | 1376.76 ± 168.61 | 504.07 ± 25.09 |
| **IL-19** | 3313.01 ± 913.86 | 3063.91 ± 671.16 | 4407.90 ± 811.58 | 2024.14 ± 0 | 2762.10 ± 436.70 | 6695.72 ± 2849.3 | 5991.98 ± 492.72 | 2024.14 ± 0 |
| **IL-22** | 809.60 ± 56.19 | 310.87 ± 19.95 | 3631.67 ± 530.30 | 602.71 ± 129.97 | 915.39 ± 112.28 | 357.67 ± 24.74 | 1411.20 ± 166.31 | 548.90 ± 97.55 |
| **IL-12p70** | 20.795 ± 5.01 | 23.65 ± 1.55 | 23.84 ± 4.28 | 39.44 ± 10.33 | 17.08 ± 1.77 | 44.61 ± 11.39 | 24.07 ± 5.54 | 28.79 ± 1.34 |
| **IL-23** | 709.522 ± 148.81 | 564.22 ± 33.38 | 2149.64 ± 329.93 | 1903.87 ± 830.60 | 743.14 ± 184.20 | 1595.90 ± 602.94 | 1827.64 ± 276.39 | 2345.63 ± 887.15 |
| **IL-27** | 86.32 ± 31.66 | 101.69 ± 28.21 | 99.81 ± 32.79 | 130.69 ± 37.89 | 38.17 ± 6.95 | 136.56 ± 54.49 | 60.12 ± 16.33 | 86.05 ± 18.34 |
| **IL-17A** | 105.58 ± 24.76 | 564.81 ± 108.57 | 53.57 ± 16.17 | 919.83 ± 89.03 | 120.40 ± 21.25 | 492.96 ± 82.54 | 37.40 ± 12.81 | 747.41 ± 83.28 |
| **IL-25** | 174.79 ± 38.93 | 255.07 ± 32.59 | 283.97 ± 77.05 | 242.82 ± 43.63 | 320.77 ± 38.52 | 274.68 ± 44.64 | 216.44 ± 78.79 | 202.40 ± 43.11 |
| **IL-6** | 1224.91 ± 232.86 | 1615.42 ± 348.93 | **7396.78 ± 836.39** | 2423.83 ± 523.0 | 985.89 ± 233.3 | 1705.52 ± 463.42 | **2627.08 ± 313.73** | 877.34 ± 316.79 |
| **IL-31** | 1393.92 ± 105.41 | 1141.7 ± 6.5E-14 | 1164.18 ± 0 | 1141.7 ± 7.19E-14 | 1273.75 ± 79.49 | 20004.08 ± 559.7 | 1309.70 ± 136.12 | 1141.7 ± 7.19E-14 |
| **LIF** | 50.92 ± 16.19 | 59.64 ± 15.21 | 51.05 ± 11.08 | 113.75 ± 32.22 | 41.33 ± 7.08 | 59.69 ± 14.46 | 29.08 ± 9.39 | 100. 328 ± 15.72 |
| **CCL2** | 622.74 ± 101.29 | 700.45 ± 194.67 | **5971.49 ± 687.14** | **2055.32 ± 385.70** | 655.89 ± 102.75 | 414.68 ± 69.92 | **1208.07 ± 265.76** | **384.66 ± 122.35** |
| **CCL3** | 32.86 ± 11.58 | 63.22 ± 19.66 | **479.42 ± 56.94** | 188.42 ± 25.5 | 24.43 ± 2.19 | 22.42 ± 2.19 | **129.68 ± 32.44** | 75.091 ± 14.17 |
| **CCL4** | 21.31 ± 3.42 | 56.91 ± 10.12 | **328.59 ± 65.53** | 169.51 ± 12.7 | 20.97 ± 2.60 | 25.52 ± 3.62 | **40.78 ± 9.88** | 80.50 ± 15.96 |
| **CCL5** | 409.57 ± 36.57 | 502.53 ± 92.99 | 565.84 ± 44.01 | 278.30 ± 24.87 | 466.36 ± 23.93 | 484.27 ± 77.07 | 579.27 ± 20.88 | 285.40 ± 21.62 |
| **CCL7** | 234.78 ± 68.56 | **1337.62 ± 337.75** | 1002.01 ± 105.91 | 866.17 ± 48.43 | 127.78 ± 18.88 | **484.14 ± 132.97** | 557.96 ± 78.45 | 477.54 ± 61.80 |
| **CCL11** | 2519.83 ± 288.16 | 3918.74 ± 178.12 | 4156.35 ± 113.69 | 3562.49 ± 225.31 | 2081.44 ± 340.78 | 3316.62 ± 311.30 | 2601.50 ± 591.70 | 2636.24 ± 7202.78 |
| **CXCL1** | 141.46 ± 36.98 | **516.87 ± 117.56** | **1064.97 ± 181.78** | 315.64 ± 28.52 | 78.59 ± 8.28 | **132.49 ± 24.42** | **155.07 ± 27.24** | 188.94 ± 35.05 |
| **CXCL2** | 34.84 ± 2.93 | 26.84 ± 3.45 | **175.93 ± 39.57** | 36.86 ± 3.07 | 30.21 ± 2.66 | 57.71 ± 21.40 | **48.48 ± 5.93** | 34.74 ± 3.29 |
| **CXCL5** | 681.99 ± 99.11 | 719.90 ± 136.35 | **1915.38 ± 347.71** | 1187.98 ± 174.06 | 553.95 ± 96.65 | 911.41 ± 291.44 | **1662.811 ± 242.38** | 1115.38 ± 118.51 |
| **CXCL10** | 483.85 ± 81.9 | 266.06 ± 166.17 | 1022.74 ± 285.85 | 0.5 ± 0 | 463.37 ± 96.21 | 163.72 ± 97.04 | 1608.94 ± 186.08 | 0.86 ± 0.34 |
| **BTC** | 71.8 ± 18.78 | 118.86 ± 12.47 | 51.97 ± 5.15 | 101.06 ± 8.50 | 52.28 ± 5.91 | 106.18 ± 11.46 | 55.46 ± 7.01 | 122.66 ± 13.81 |
| **G-CSF** | 49.48 ± 7.32 | 50.21 ± 10.03 | 64.90 ± 23.68 | **181.29 ± 33.87** | 37.12 ± 5.50 | 56.94 ± 9.31 | 33.45 ± 2.08 | **60.32 ± 18.98** |
| **GM-CSF** | 156.75 ± 31.52 | 128.73 ± 29.09 | 90.26 ± 0 | 222.80 ± 37.24 | 129.96 ± 25.84 | 211.88 ± 71.07 | 136.29 ± 32.71 | 183.55 ± 8.98E-15 |
| **M-CSF** | 14.54 ± 1.92 | 10.28 ± 1.94 | 26.42 ± 3.34 | 6.59 ± 1.56 | 14.14 ± 1.80 | 17.76 ± 7.92 | 25.50 ± 2.21 | 2.80 ± 1.12 |
| **IL-3** | 14.89 ± 4.89 | 27.35 ± 5.30 | **18.20 ± 4.49** | 181.25 ± 41.83 | 12.77 ± 1.86 | 70.98 ± 30.23 | **14.92 ± 3.42** | 0.215 ± 0 |
| **IL-22** | 802.32 ± 60.54 | 310.87 ± 20.83 | **3631.6725 ± 553.88** | 602.714 ± 137. | 861.714 ± 107.95 | **357.677 ± 25.95** | 1411.2075 ± 177.79 | 548.904 ± 102.82 |
| **VEGF-A** | 920.13 ± 154.35 | 420.49 ± 26.15 | 3110.70 ± 616.08 | 459.95 ± 20.26 | 949.74 ± 91.96 | 1124.80 ± 507.35 | 2116.55 ± 415.50 | 475.98 ± 23.22 |
| **IL-13** | 42.14 ± 10.58 | 35.23 ± 8.45 | 115.68 ± 18.43 | 39.29 ± 9.79 | 32.36 ± 5.09 | 42.47 ± 11.70 | 100.84 ± 15.15 | 39.29 ± 9.79 |
| **IL-5** | 237.54 ± 30.84 | 257.46 ± 70.74 | **629.88 ± 110.55** | 344.56 ± 63.86 | 207.32 ± 16.77 | 200.64 ± 70.59 | **214.76 ± 15.23** | 192.30 ± 62.17 |
| **Leptin** | 1585.58 ± 147.89 | 9701.62 ± 7584.37 | 2487.14 ± 146.53 | 1507.66 ± 0 | 1931.05 ± 178.07 | 2581.75 ± 594.07 | 2116.11 ± 149.77 | 1507.66 ± 0 |

* Bold indicates a statistically significant difference between sexes at a given DPI based on multiple unpaired t tests with Holm-Šídák correction for multiple comparisons, adjusted p value <0.05 (n=4-7/group) +/- SEM
