# Supplementary material for: Influenza B virus suppression of Chromosome Y-linked genes increases pulmonary virus replication and disease severity in male mice
Source: Research Square preprint supplement (doi:10.21203/rs.3.rs-9066058/v1), 2026-03-24
Supplement: Supplementary file 4 [file 98546ace1dc7085ad6e30f58.docx]

|  | Target cells | Markers and gating strategy |
| --- | --- | --- |
| 1 | PDCA1+ pDCs | [CD45+] [CD11c+] [Lys6G-] [MHCII+/-] [PDCA1+] |
| 2 | Ly6C+ CCR2+ IMMs | [CD45+] [CD11b+] [Ly6C+] [Lys6G-] [F4/80+] [CCR2 hi↑] |
| 3 | Alveolar Macrophages | [CD45+] [CD11c+] [CD11b-/+] [F4/80+] [Ly6C-] [SiglecF+] |
| 4 | CD206+ (M2) Macrophages | [CD45+] [F4/80+] [CD11b+] [CD206+] |
| 5 | Interstitial Macrophages | CD45+] [CD11c+] [F4/80+] [Ly6C-] [SiglecF-] |
| 6 | Eosinophils | [CD45 +] [SiglecF +] [F4/80 -/+] [CD11c -] [CD11b +] |
| 7 | M1 Macrophages | [CD45+] [F4/80+] [CD11b+] [CD86+] |
| 8 | Neutrophils | [CD45+] [CD11b+] [Ly6G+] [Ly6C -/+] [F4/80-] |
