# Supplementary material for: Influenza B virus suppression of Chromosome Y-linked genes increases pulmonary virus replication and disease severity in male mice
Source: Research Square preprint supplement (doi:10.21203/rs.3.rs-9066058/v1), 2026-03-24
Supplement: Supplementary file 5 [file d2da24456f0816ca767f8086.docx]

|  | Targets | Fluor | Cat# Small size | Link |
| --- | --- | --- | --- | --- |
| 1 | Viability | Zombie NIR | 423105 | <https://www.biolegend.com/en-us/products/zombie-nir-fixable-viability-kit-8657> |
| 2 | CD45 | AF700 | 103127 | <https://www.biolegend.com/en-us/products/alexa-fluor-700-anti-mouse-cd45-antibody-3407> |
| 3 | CD11b | SparkUV 387 | 101291 | <https://www.biolegend.com/en-us/products/spark-uv-387-anti-mouse-human-cd11b-antibody-22118> |
| 4 | Ly6G | PEDazzle | 127647 | <https://www.biolegend.com/en-us/products/pe-dazzle-594-anti-mouse-ly-6g-antibody-12246> |
| 5 | Ly6C | APC | 128015 | <https://www.biolegend.com/en-us/products/apc-anti-mouse-ly-6c-antibody-6047> |
| 6 | CCR2/CD192 | BV785 | 150621 | <https://www.biolegend.com/en-us/products/brilliant-violet-785-anti-mouse-cd192-ccr2-antibody-15388> |
| 7 | F4/80 | PE | 123109 | <https://www.biolegend.com/en-us/products/pe-anti-mouse-f4-80-antibody-4068> |
| 8 | CD86 | BV605 | 105037 | <https://www.biolegend.com/en-us/products/brilliant-violet-605-anti-mouse-cd86-antibody-7798> |
| 9 | CD206 | BV711 | 141727 | <https://www.biolegend.com/en-us/products/brilliant-violet-711-anti-mouse-cd206-mmr-antibody-12012> |
| 10 | Siglec F/CD170 | PE/Cy7 | 155527 | <https://www.biolegend.com/en-us/products/pe-cyanine7-anti-mouse-cd170-siglec-f-antibody-20500> |
| 11 | PDCA1/CD317 | BV650 | 127019 | <https://www.biolegend.com/en-us/products/brilliant-violet-650-anti-mouse-cd317-bst2-pdca-1-antibody-8847> |
| 12 | CD11c | KB520 | 117363 | <https://www.biolegend.com/en-us/products/kiravia-blue-520-anti-mouse-cd11c-antibody-19127> |
| 13 | MHC-II | BV421 | 107631 | <https://www.biolegend.com/en-us/products/brilliant-violet-421-anti-mouse-i-a-i-e-antibody-7147> |
