# Supplementary material for: Influenza B virus suppression of Chromosome Y-linked genes increases pulmonary virus replication and disease severity in male mice
Source: Research Square preprint supplement (doi:10.21203/rs.3.rs-9066058/v1), 2026-03-24
Supplement: Supplementary file 6 [file e819d81401f82635996bcd54.docx]

| Analyte | Male Spleen | | | |  | | Female Spleen | | |
| --- | --- | --- | --- | --- | --- | --- | --- | --- | --- |
| Cytokine | **Mock** | **3 DPI** | **5 DPI** | **7 DPI** | **Mock** | **3 DPI** | | **5 DPI** | **7 DPI** |
| IFNγ | 40.45 ± 7.23 | 34.48 ± 6.86 | 662.04 ± 214.96 | 789.37 ± 198.38 | 88.45 ± 7.88 | 71.82 ± 8.43 | | 624.32 ± 213.36 | 758.70 ± 245.22 |
| IFN α | 775.56 ± 168.55 | 710.96 ± 150.07 | 1369.39 ± 259.38 | 1397.84 ± 174.29 | 570.87 ± 73.45 | 961.55 ± 115.92 | | 2702.37 ± 878.52 | 3429.80 ± 751.55 |
| IL-28 | 12632.90 ± 2085.48 | **12321.78 ± 2619.74** | 88566.70 ± 26025.29 | 168629.02 ± 35287.98 | 20285.15 ± 4205.04 | **19362.61 ± 3015.18** | | 87545.02 ± 21620.58 | 40567.16 ± 9220.78 |
| IL-1α | 340.00 ± 59.50 | 441.12 ± 135.47 | 1008.74 ± 119.54 | 4483.51 ± 2325.20 | 516.80 ± 76.86 | 326.17 ± 78.74 | | 2795.03 ± 660.98 | 5663.27 ± 2465.38 |
| IL-1β | 232.19 ± 100.75 | 139.49 ± 41.26 | 182.59 ± 51.33 | 119.52 ± 21.03 | 71.76 ± 6.52 | 71.76 ± 6.52 | | 167.30 ± 34.72 | 146.51 ± 17.06 |
| IL-18 | 412.36 ± 84.34 | 387.21 ± 81.54 | 6780.37 ± 4293.83 | 10732.28 ± 3374.98 | 808.96 ± 119.30 | 652.81 ± 90.37 | | 5821.25 ± 1411.45 | 14469.68 ± 3954.73 |
| IL-33 | 14185.93 ± 4024.40 | 13474.14 ± 4312.69 | 30710.74 ± 5505.81 | 35783.00 ± 5227.59 | 29133.33 ± 8442.12 | 30300.90 ± 5972.29 | | 64742.98 ± 24199.22 | 34829.26 ± 4314.35 |
| IL-33R | 2377.25 ± 720.69 | 1876.44 ± 286.83 | 6716.31 ± 2803.25 | 7645.93 ± 2973.19 | 2579.93 ± 303.14 | 2183.02 ± 198.45 | | 21024.57 ± 4899.16 | 13475.43 ± 4144.45 |
| IL-2 | 177.33 ± 40.54 | 162.21 ± 34.62 | 327.85 ± 135.97 | 235.59 ± 37.45 | 201.12 ± 40.23 | 155.60 ± 13.98 | | 332.47 ± 161.81 | 339.06 ± 95.43 |
| IL-2R | 57.73 ± 12.74 | 56.55 ± 10.39 | 43.75 ± 8.18 | 26.91 ± 6.04 | 52.89 ± 4.50 | 46.85 ± 2.18 | | 92.33 ± 55.74 | 21.91 ± 7.54 |
| IL-4 | 248.30 ± 36.64 | 189.84 ± 28.68 | 696.91 ± 140.90 | 1015.57 ± 288.90 | 312.70 ± 16.45 | 213.95 ± 25.14 | | 1123.58 ± 304.41 | 1178.08 ± 281.72 |
| IL-7 | 366.69 ± 75.42 | 353.02 ± 71.66 | 4649.17 ± 1569.10 | 8060.03 ± 1922.96 | 752.31 ± 136.68 | 742.33 ± 136.26 | | 6040.60 ± 903.01 | 2382.54 ± 884.04 |
| IL-7Rα | 1094.97 ± 915.24 | 2155.41 ± 1839.24 | 8016.79 ± 2570.25 | 5665.47 ± 2171.67 | 3969.25 ± 2255.51 | 1208.98 ± 270.12 | | 10294.58 ± 2814.61 | 9658.68 ± 2494.59 |
| IL-9 | 130.04 ± 34.71 | 127.19 ± 35.24 | 168.42 ± 40.54 | 219.85 ± 34.40 | 88.35 ± 11.52 | 143.68 ± 16.71 | | 282.07 ± 0.00 | 282.07 ± 0.00 |
| IL-15/ 15R | 138.02 ± 41.78 | 107.64 ± 24.82 | 205.75 ± 16.19 | 185.11 ± 19.68 | 215.77 ± 52.78 | 137.13 ± 45.73 | | 163.41 ± 18.65 | 144.27 ± 15.54 |
| TNFα | 59.76 ± 17.49 | 54.98 ± 17.42 | 189.72 ± 53.30 | 349.29 ± 64.18 | 67.79 ± 13.58 | 138.81 ± 35.31 | | 206.57 ± 38.74 | 158.45 ± 8.27 |
| TNFSF11 | 163.73 ± 33.01 | 153.34 ± 34.14 | 419.70 ± 177.67 | 387.00 ± 106.31 | 240.19 ± 12.95 | 282.12 ± 23.23 | | 602.69 ± 134.48 | 234.10 ± 49.94 |
| BAFF | 365.24 ± 114.66 | 351.07 ± 106.00 | 2150.11 ± 646.47 | 3668.11 ± 1221.98 | 45.38 ± 8.90 | 41.41 ± 8.11 | | 7319.57 ± 1932.25 | 8685.44 ± 1815.81 |
| IL-10 | 485.99 ± 65.73 | 470.86 ± 65.21 | 2915.72 ± 798.49 | 4756.74 ± 1029.51 | 287.45 ± 0.00 | 402.43 ± 46.94 | | 9012.24 ± 2478.86 | 5015.75 ± 1235.96 |
| IL-19 | 7104.70 ± 1574.67 | 9078.48 ± 2338.73 | 20013.81 ± 3717.04 | 26984.46 ± 4135.02 | 7319.59 ± 610.60 | 5161.01 ± 918.70 | | 30679.41 ± 4501.64 | 25346.38 ± 3713.55 |
| IL-22 | 353.05 ± 105.56 | 389.83 ± 198.43 | 323.15 ± 27.42 | 628.77 ± 166.94 | 163.43 ± 61.50 | 54.15 ± 25.64 | | 1742.97 ± 1382.36 | 858.10 ± 528.47 |
| IL-12p70 | 16.18 ± 2.21 | 16.31 ± 2.53 | 153.29 ± 65.06 | 315.94 ± 97.89 | 11.35 ± 1.33 | 10.76 ± 0.88 | | 262.15 ± 84.83 | 371.17 ± 118.15 |
| IL-23 | 853.45 ± 199.18 | 1223.03 ± 480.64 | 3080.68 ± 703.21 | **4768.30 ± 1079.34** | 1343.16 ± 255.93 | 688.97 ± 154.12 | | 6231.02 ± 857.96 | **3314.04 ± 465.86** |
| IL-27 | 112.14 ± 26.31 | 90.54 ± 18.76 | 462.05 ± 158.46 | 878.78 ± 558.17 | 192.86 ± 35.88 | 74.57 ± 23.32 | | 1321.44 ± 1019.63 | 894.61 ± 623.56 |
| IL-17A | 236.14 ± 56.42 | 314.65 ± 87.98 | 1003.40 ± 403.66 | 427.34 ± 95.52 | 352.18 ± 93.79 | 399.99 ± 166.34 | | 1008.70 ± 716.34 | 484.19 ± 136.43 |
| IL-25 | 290.83 ± 33.03 | 248.44 ± 11.79 | 377.65 ± 89.99 | 628.77 ± 135.16 | 277.96 ± 0.00 | 353.09 ± 75.13 | | 1159.66 ± 341.19 | 697.64 ± 143.29 |
| IL-6 | 1605.61 ± 466.96 | 1579.71 ± 385.33 | 3213.34 ± 736.84 | 2918.51 ± 656.68 | 1778.44 ± 198.58 | 1359.62 ± 288.06 | | 3385.80 ± 740.58 | 3687.19 ± 777.88 |
| IL-31 | 2621.30 ± 829.07 | 2712.37 ± 831.50 | 5492.94 ± 848.55 | 3523.68 ± 573.53 | 1416.29 ± 286.58 | 1419.98 ± 343.65 | | 7876.44 ± 1098.37 | 6646.68 ± 1161.59 |
| LIF | 56.03 ± 14.38 | 56.07 ± 11.71 | 110.81 ± 20.96 | 93.61 ± 18.60 | 89.54 ± 17.87 | 52.33 ± 14.40 | | 77.03 ± 9.00 | 81.90 ± 19.79 |
| CCL2 | 1020.33 ± 179.15 | 919.43 ± 200.84 | 934.49 ± 303.24 | 305.72 ± 21.86 | 1231.60 ± 113.28 | 939.15 ± 123.39 | | 783.97 ± 324.69 | 345.27 ± 38.18 |
| CCL3 | 110.05 ± 40.00 | 101.11 ± 39.24 | 110.96 ± 19.47 | 95.70 ± 14.88 | 90.53 ± 8.78 | 94.61 ± 8.31 | | 239.02 ± 50.13 | 232.18 ± 54.09 |
| CCL4 | 39.25 ± 15.76 | 36.17 ± 12.61 | 42.74 ± 9.28 | 44.84 ± 8.66 | 48.84 ± 5.91 | 46.59 ± 5.02 | | 68.69 ± 34.25 | 26.99 ± 6.86 |
| CCL5 | 795.07 ± 127.07 | 821.45 ± 84.84 | 630.32 ± 100.54 | 1100.64 ± 418.04 | 579.81 ± 54.53 | 748.77 ± 50.10 | | 1587.88 ± 656.68 | 727.55 ± 120.35 |
| CCL7 | 285.39 ± 100.99 | 291.08 ± 71.37 | 813.77 ± 154.65 | 1277.87 ± 559.64 | 484.11 ± 47.58 | 354.56 ± 26.35 | | 2293.56 ± 622.50 | 1736.58 ± 485.85 |
| CCL11 | 2675.34 ± 539.52 | 2557.36 ± 548.95 | 3237.07 ± 370.08 | 2230.02 ± 494.51 | 4275.00 ± 0.00 | 4275.00 ± 0.00 | | 2468.20 ± 509.90 | 2318.66 ± 576.35 |
| CXCL1 | 135.50 ± 41.33 | 105.95 ± 20.89 | 388.56 ± 109.22 | 253.31 ± 50.30 | 358.88 ± 89.60 | 179.50 ± 36.80 | | 181.44 ± 22.32 | 153.01 ± 17.42 |
| CXCL2 | 32.95 ± 11.57 | 18.66 ± 3.65 | 67.09 ± 14.34 | 156.12 ± 49.61 | 13.59 ± 0.00 | 12.23 ± 0.90 | | 239.71 ± 81.91 | 256.67 ± 59.24 |
| CXCL5 | 1275.32 ± 255.07 | 1313.37 ± 261.01 | 3781.41 ± 1193.55 | 15852.90 ± 7093.68 | 2677.60 ± 425.95 | 2381.69 ± 159.32 | | 23915.26 ± 8771.51 | 26312.13 ± 7875.87 |
| CXCL10 | 962.40 ± 218.38 | 1090.82 ± 184.88 | 1084.88 ± 228.53 | 1156.89 ± 219.41 | 2946.89 ± 344.90 | 3086.92 ± 435.45 | | 1538.45 ± 92.07 | 1430.71 ± 169.76 |
| BTC | 137.30 ± 46.34 | 156.04 ± 45.02 | 332.92 ± 74.85 | 323.28 ± 113.52 | 45.38 ± 8.90 | 41.41 ± 8.11 | | 161.82 ± 50.79 | 149.02 ± 30.04 |
| G-CSF | 61.03 ± 13.53 | 49.91 ± 10.36 | 76.83 ± 8.26 | 336.18 ± 260.58 | 62.64 ± 10.31 | 59.18 ± 11.73 | | 234.21 ± 176.22 | 175.54 ± 98.49 |
| GM-CSF | 395.31 ± 142.86 | 377.50 ± 102.08 | 670.51 ± 232.07 | 529.01 ± 113.96 | 370.66 ± 47.13 | 382.40 ± 65.76 | | 850.80 ± 319.91 | 451.87 ± 129.36 |
| M-CSF | 13.35 ± 3.46 | 10.48 ± 2.21 | 57.77 ± 15.55 | 88.83 ± 23.43 | 6.91 ± 0.76 | 8.26 ± 2.22 | | 196.84 ± 77.89 | 79.93 ± 26.22 |
| IL-3 | 40.63 ± 18.14 | 33.75 ± 11.56 | 81.54 ± 18.82 | 76.61 ± 27.51 | 18.95 ± 5.34 | 13.20 ± 7.33 | | 70.52 ± 18.45 | 63.55 ± 23.43 |
| VEGF-A | 462.69 ± 119.24 | 361.26 ± 83.46 | 1344.07 ± 487.25 | 1658.41 ± 559.65 | 716.00 ± 104.91 | 762.01 ± 96.91 | | 3274.32 ± 814.94 | 2867.27 ± 687.32 |
| IL-13 | 94.18 ± 22.08 | 85.89 ± 25.34 | 224.43 ± 54.78 | 106.86 ± 12.07 | 189.16 ± 41.60 | 179.40 ± 45.37 | | 310.88 ± 104.32 | 265.08 ± 114.90 |
| IL-5 | 213.06 ± 57.36 | 226.82 ± 65.09 | 279.47 ± 138.76 | 553.08 ± 162.01 | 48.72 ± 20.56 | 111.45 ± 31.83 | | 346.36 ± 145.17 | 387.50 ± 168.72 |
| Leptin | 1639.06 ± 762.29 | 1843.16 ± 749.51 | 8633.98 ± 2735.48 | 11448.97 ± 3256.61 | 48.52 ± 5.39 | 590.49 ± 541.09 | | 9383.35 ± 2471.16 | 16141.42 ± 4146.61 |

* Bold indicates a statistically significant difference between sexes at a given DPI based on multiple unpaired t tests with Holm-Šídák correction for multiple comparisons, adjusted p value <0.05 (n=4-7/group) +/- SEM
